# Supplementary material
Source: PubMed Central journal article supplement (PMC4092316)
Supplement: psb-9-e27994-s02.pdf [file psb-9-e27994-s02.pdf]

## **Supplemental Material to:**

**Eduardo González-Grandío and Pilar Cubas\***

**Identification of gene functions associated to active and  
dormant buds in Arabidopsis**

**Plant Signaling & Behavior 2013; 9(1)**

**<http://dx.doi.org/10.4161/psb.27994>**

**[www.landesbioscience.com/journals/psb/article/27994](http://www.landesbioscience.com/journals/psb/article/27994)**

**[www.landesbioscience.com/journals/psb/article/27994/2013PSB0449R-ST1.xlsx](http://www.landesbioscience.com/journals/psb/article/27994/2013PSB0449R-ST1.xlsx)**

## **Supplemental Table I**

Expression data from Tatematsu et al. 2005 and Reddy et al. 2013 were retrieved from Gene Omnibus database (<http://www.ncbi.nlm.nih.gov/geo/>) and sorted by FDR. The 1000 most statistically significant up- and down-regulated genes with fold change  $<-1.1$  or  $>1.1$  were used for the analysis (Sheet 1: Gene lists). Activation and dormancy genes of the three experiments were compared pair-wise to obtain common elements lists (Sheet 2: Pairwise comparisons). Genes common for the three experiments were further analyzed using ATTED-II<sup>9</sup>, Mapman<sup>17</sup>, Genevestigator [ENREF\\_12](#)<sup>11</sup> and TAIR (<http://www.arabidopsis.org/>) gene description database (Sheets 3 and 4: Bud activation and bud dormancy genes). Genes in bold are *BRC1*-dependent genes according to Gonzalez-Grandío et al. (2013).

**Supplemental Figure 1. *Bud activation genes co-regulation networks.*** Networks of *bud activation* co-regulated genes from Supplemental Table I were represented using Network Drawer (ATTED-II<sup>9</sup>). Additional co-regulated genes were included. From left to right, cell cycle-related, flavonoid synthesis-related and cytokinin signaling networks. The same applies to the next supplemental figures.

**Supplemental Figure 2. *Bud dormancy genes: ABA signaling co-regulation networks.***

**Supplemental Figure 3. *Bud dormancy genes: auxin and ethylene signaling gene network.***

**Supplemental Figure 4. *Bud dormancy genes: dark-induced, sugar repressed gene network.***

**Supplemental Figure 5. *Bud dormancy genes: autophagy and protein degradation gene network.***

# Supplemental Figure 1

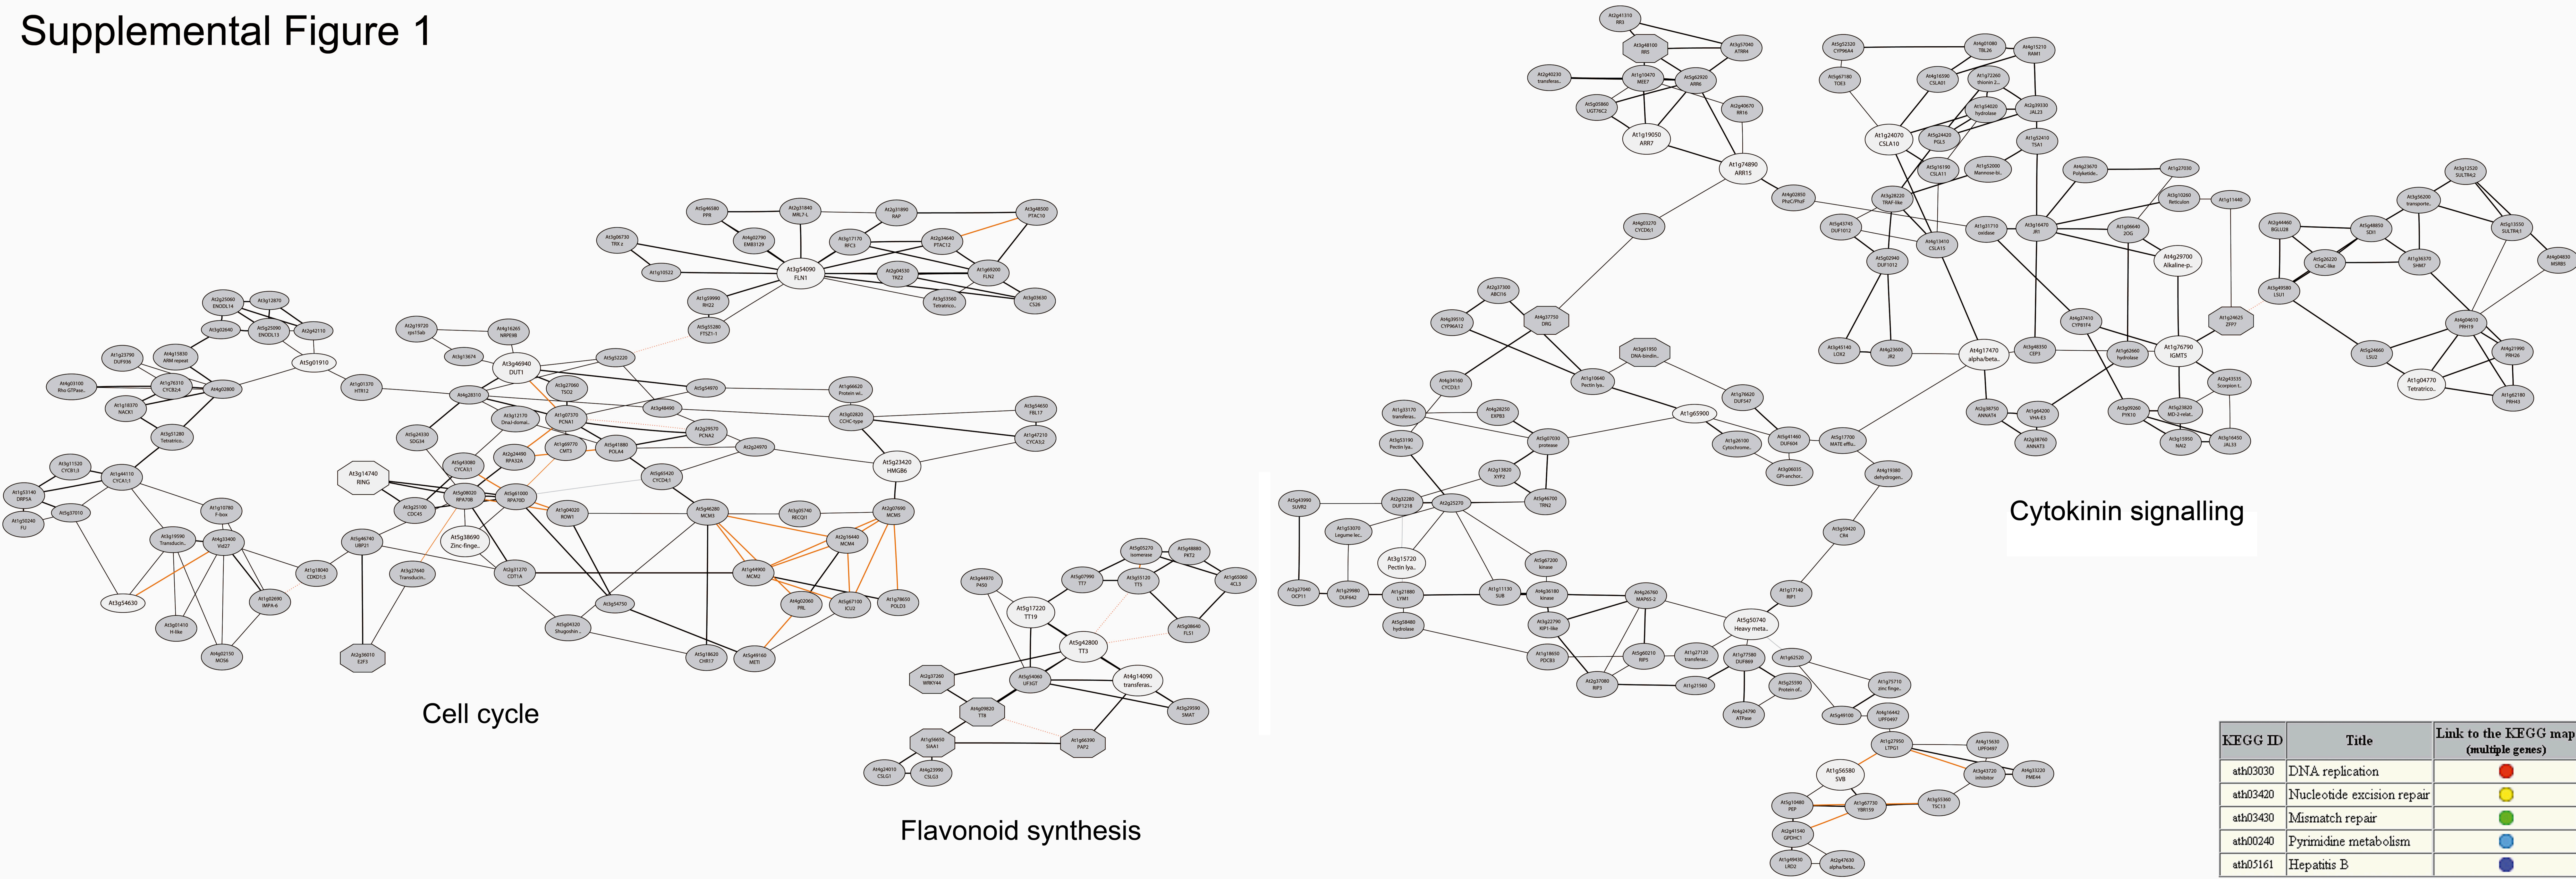





# Supplemental Figure 4

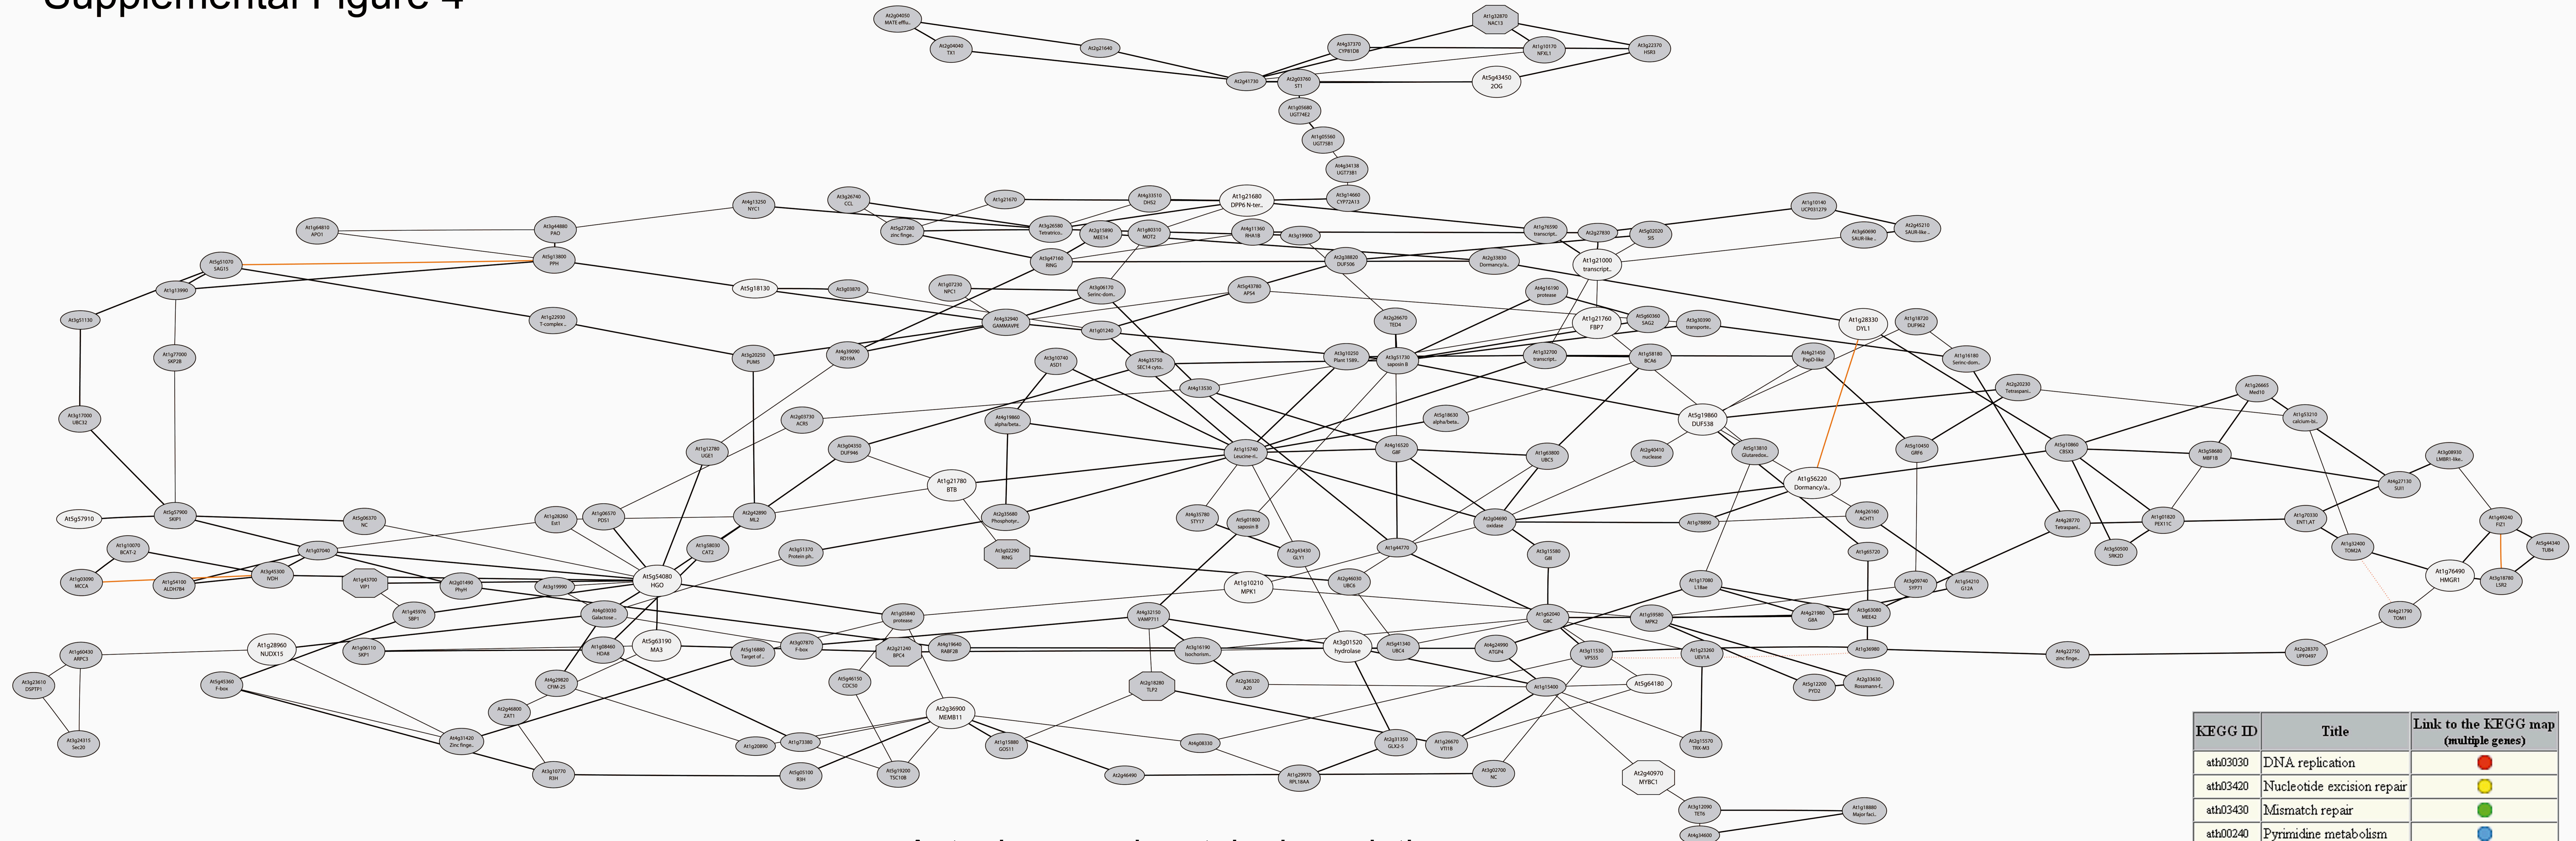

## Autophagy and protein degradation

| KEGG ID  | Title                      | Link to the KEGG map (multiple genes) |
|----------|----------------------------|---------------------------------------|
| ath03030 | DNA replication            |                                       |
| ath03420 | Nucleotide excision repair |                                       |
| ath03430 | Mismatch repair            |                                       |
| ath00240 | Pyrimidine metabolism      |                                       |
| ath05161 | Hepatitis B                |                                       |

# Supplemental Figure 5

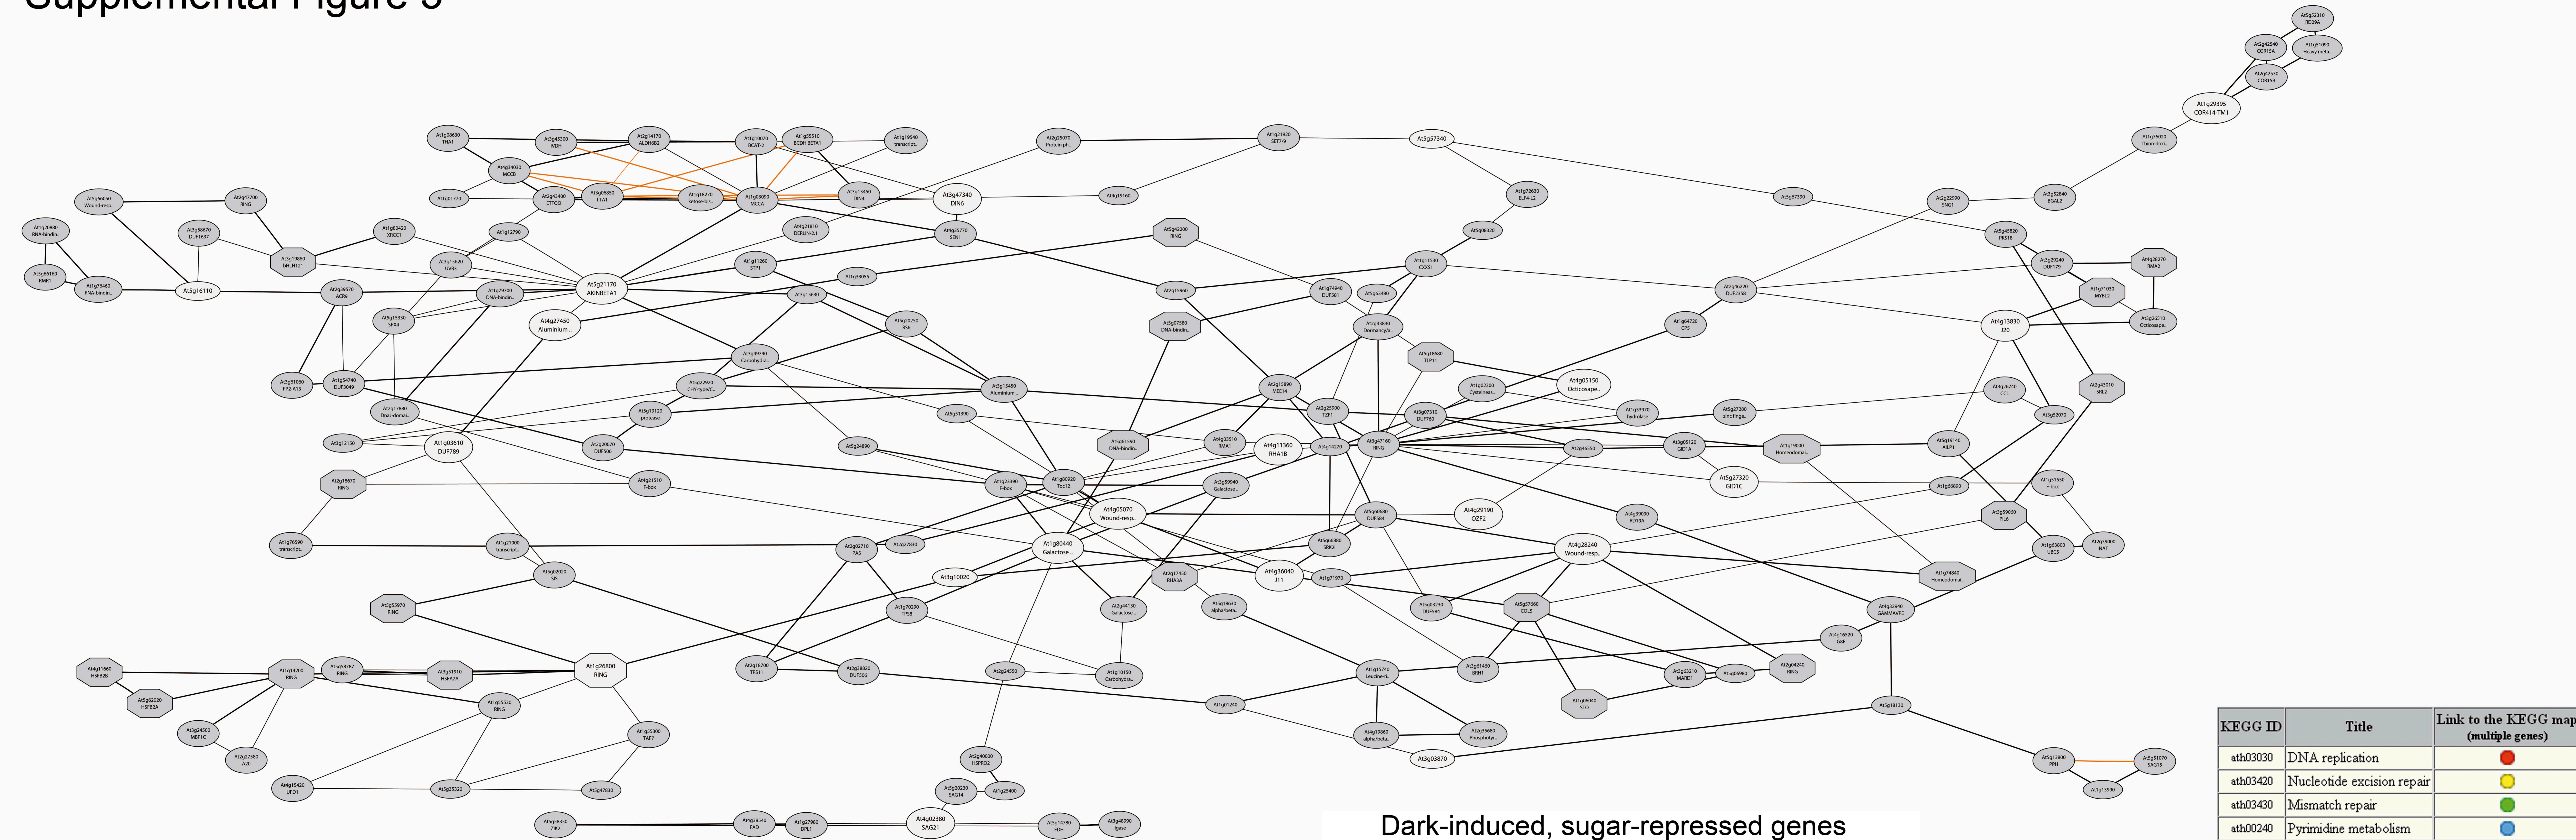

Dark-induced, sugar-repressed genes

| KEGG ID  | Title                      | Link to the KEGG map (multiple genes) |
|----------|----------------------------|---------------------------------------|
| ath03030 | DNA replication            |                                       |
| ath03420 | Nucleotide excision repair |                                       |
| ath03430 | Mismatch repair            |                                       |
| ath00240 | Pyrimidine metabolism      |                                       |
| ath05161 | Hepatitis B                |                                       |
